# Supplementary material for: Bimetallic ZIF-Derived Co/N-Codoped Porous Carbon Supported Ruthenium Catalysts for Highly Efficient Hydrogen Evolution Reaction
Source: MDPI journal article supplement (doi:10.3390/nano11051228), 2021-05-06
Supplement: s1 [file s1]

Supporting Information

# Bimetallic ZIF-Derived Co/N-Codoped Porous Carbon-Supported Ruthenium Catalysts for Highly Efficient Hydrogen Evolution Reaction

Hui Qi <sup>†</sup>, Xinglong Guan <sup>†</sup>, Guangyu Lei, Mengyao Zhao, Hongwei He, Kai Li, Guoliang Zhang, Fengbao Zhang, Xiaobin Fan, Wenchao Peng, and Yang Li <sup>\*</sup>

Lab of Advanced Nano-Structure and Transfer Process, Department of Chemical Engineering, Tianjin University, Tianjin 300354, China; qihui1101@tju.edu.cn (H.Q.); tjugxl@tju.edu.cn; (X.G.); guangyulei@tju.edu.cn (G.L.); Zhaomy@tju.edu.cn (M.Z.); hehongwei@tju.edu.cn (H.H.); tjulikai@tju.edu.cn (K.L.); zhangguoliang@tju.edu.cn (G.Z.); fbzhang@tju.edu.cn (F.Z.); xiaobinfan@tju.edu.cn (X.F.); wenchao.peng@tju.edu.cn (W.P.)

<sup>\*</sup> Correspondence: liyang1895@tju.edu.cn; Tel.: +86-22-2789-0090

<sup>†</sup> The authors contribute equal to this study.

**Citation:** Qi, H.; Guan, X.; Lei, G.; Zhao, M.; He, H.; Li, K.; Zhang, G.; Zhang, F.; Fan, X.; Peng, W.; et al. Bimetallic ZIF-Derived Co/N-Codoped Porous Carbon-Supported Ruthenium Catalysts for Highly Efficient Hydrogen Evolution Reaction. *Nanomaterials* **2021**, *11*, 1228. <https://doi.org/10.3390/nano11051228>

Academic Editor: Akinobu Yamaguchi

Received: 11 April 2021

Accepted: 28 April 2021

Published: 6 May 2021

**Publisher's Note:** MDPI stays neutral with regard to jurisdictional claims in published maps and institutional affiliations.

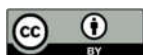

**Copyright:** © 2021 by the authors. Submitted for possible open access publication under the terms and conditions of the Creative Commons Attribution (CC BY) license (<http://creativecommons.org/licenses/by/4.0/>).

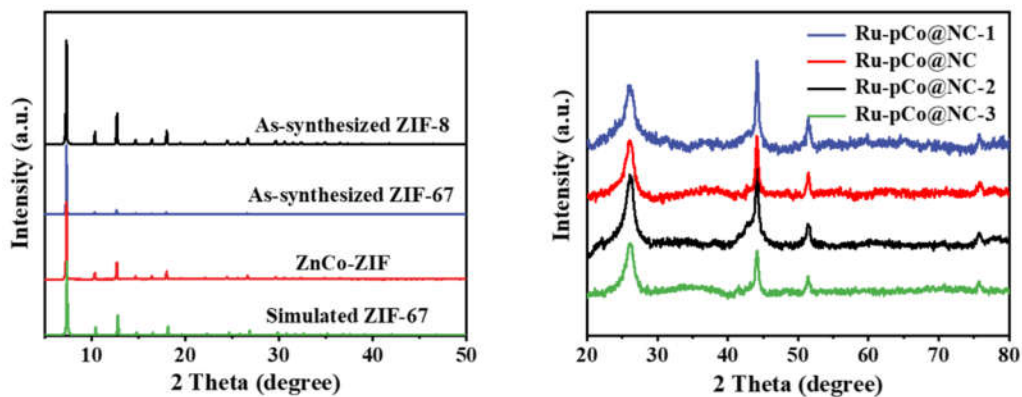

**Figure S1.** (a) XRD patterns of as-synthesized ZIF-8, ZIF-67, ZnCo-ZIF, and simulated ZIF-67; (b) XRD patterns of Ru-pCo@NC-1, Ru-pCo@NC, Ru-pCo@NC-2, and Ru-pCo@NC-3.

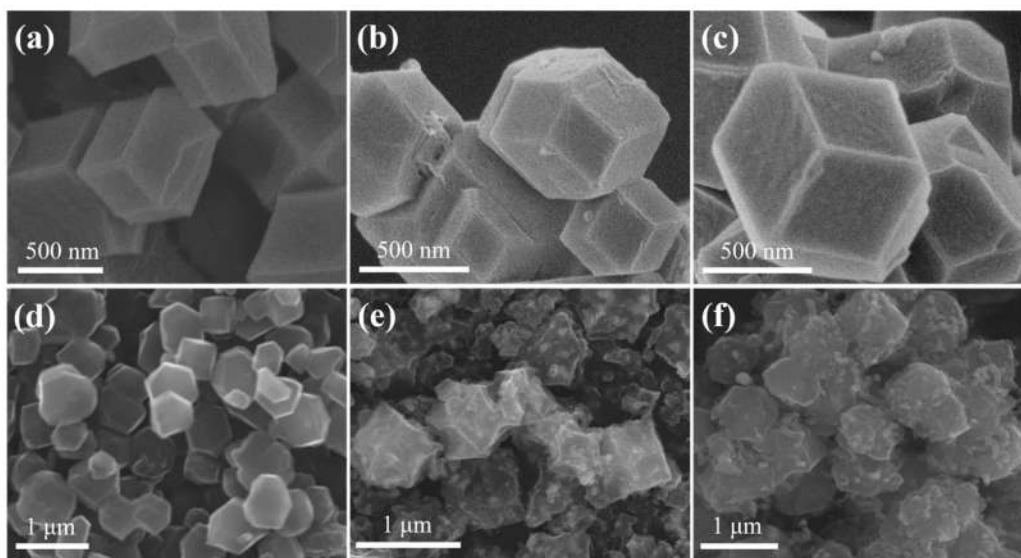

**Figure S2.** (a-c) SEM images of as-synthesized ZIF-8, ZIF-67 and ZnCo-ZIF with Zn/Co molar ratio of 7:3, respectively; (d-f) SEM images of their pyrolysis products NC, Co@NC and pCo@NC, respectively.

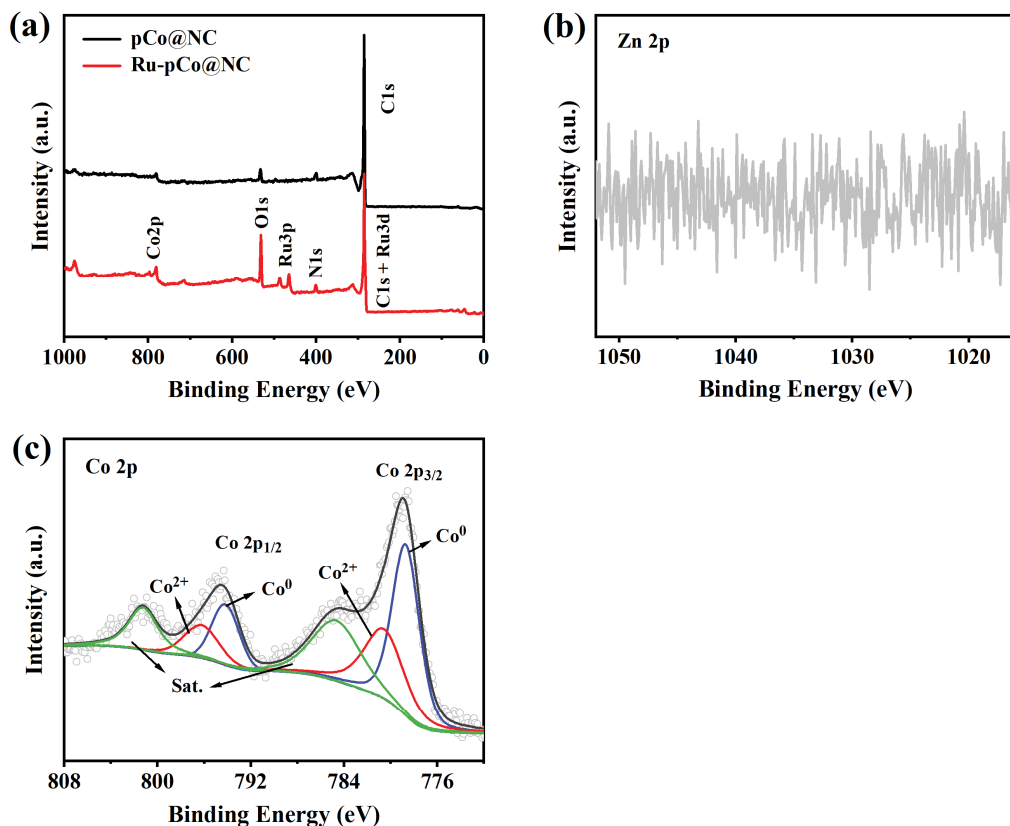

**Figure S3.** (a) XPS survey spectra of pCo@NC and Ru-pCo@NC, (b) high-resolution Zn 2p spectrum and (c) high-resolution Co 2p spectrum of Ru-pCo@NC.

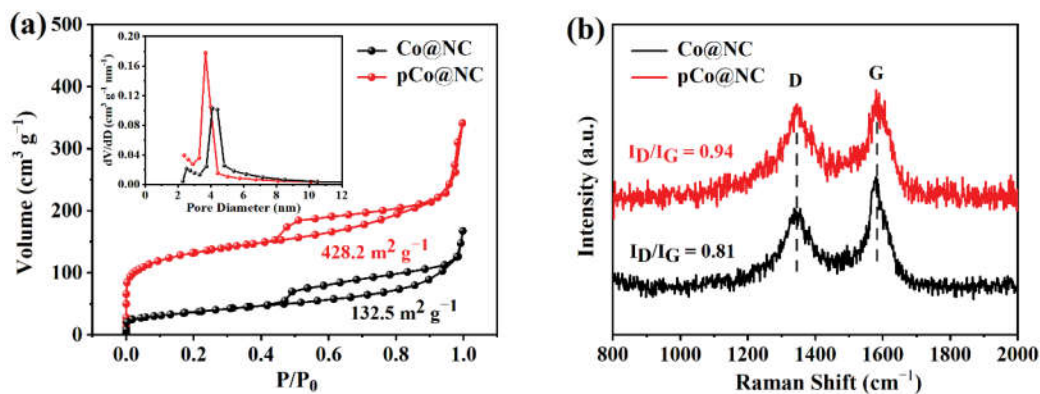

**Figure S4.** (a) N<sub>2</sub> adsorption/desorption isotherms and pore size distributions (insert) and (b) Raman spectra of Co@NC and pCo@NC.

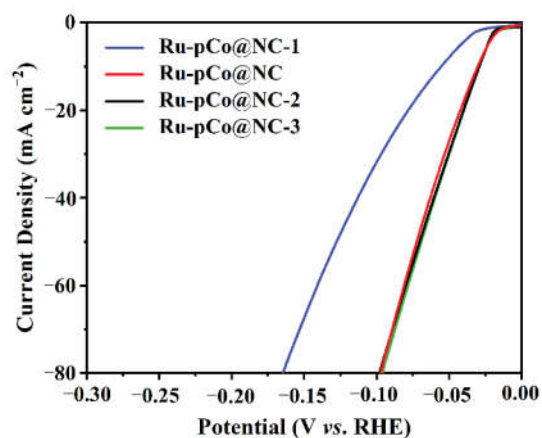

**Figure S5.** LSV curves of of Ru-pCo@NC-1, Ru-pCo@NC, Ru-pCo@NC-2, and Ru-pCo@NC-3 in 1 M KOH.

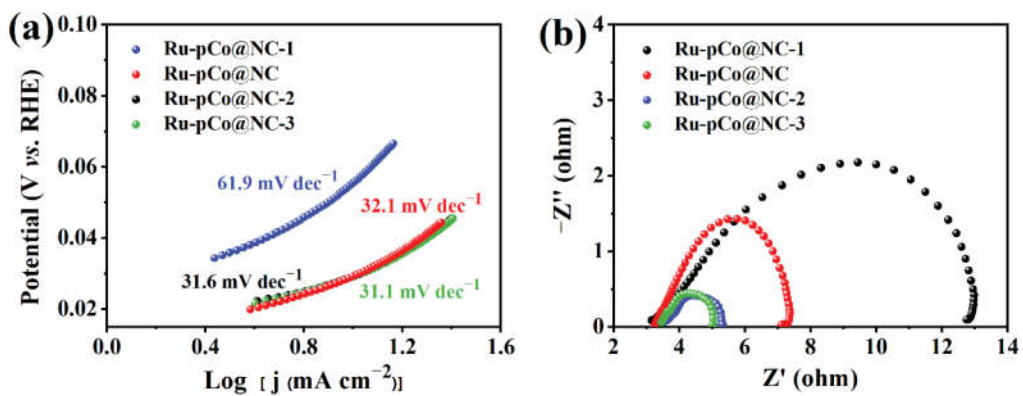

**Figure S6.** (a) Tafel plots and (b) Nyquist plots of Ru-pCo@NC-1, Ru-pCo@NC, Ru-pCo@NC-2, and Ru-pCo@NC-3 in 1 M KOH.

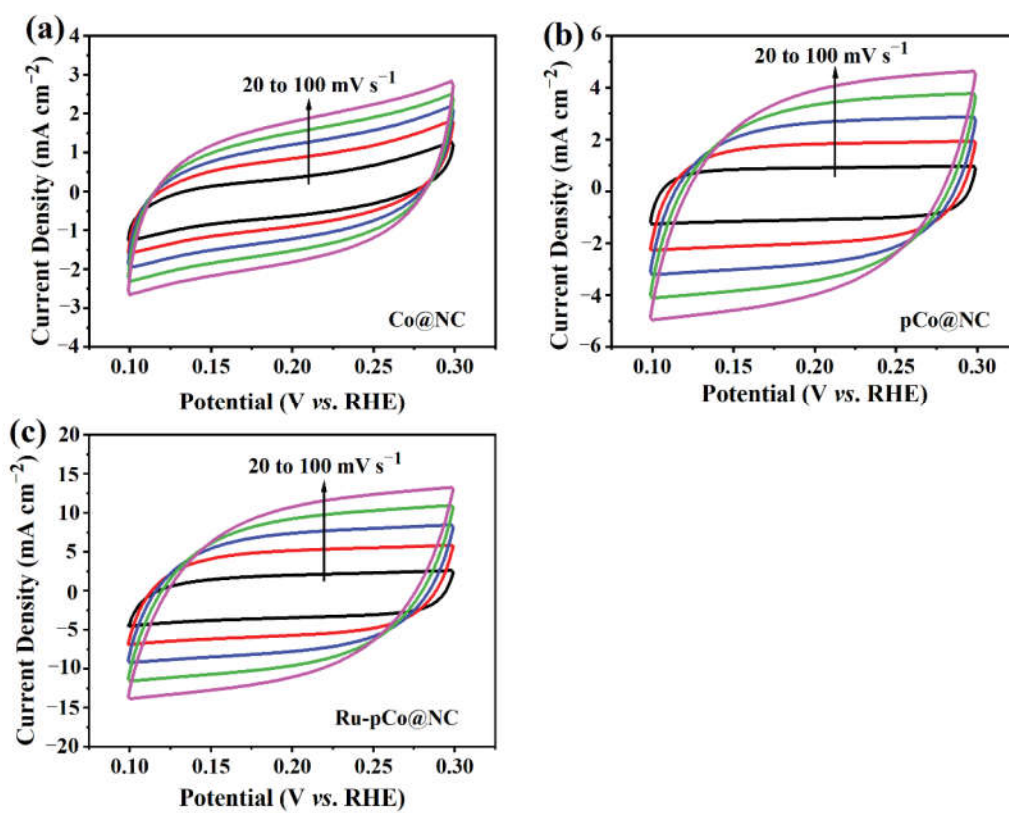

**Figure S7.** Cyclic voltammetry (CV) curves of (a) Co@NC, (b) pCo@NC and (c) Ru-pCo@NC from 0.1 to 0.3 V (*vs.* RHE) with scan rate from 20 to 100  $\text{mV s}^{-1}$  in 1 M KOH, respectively.

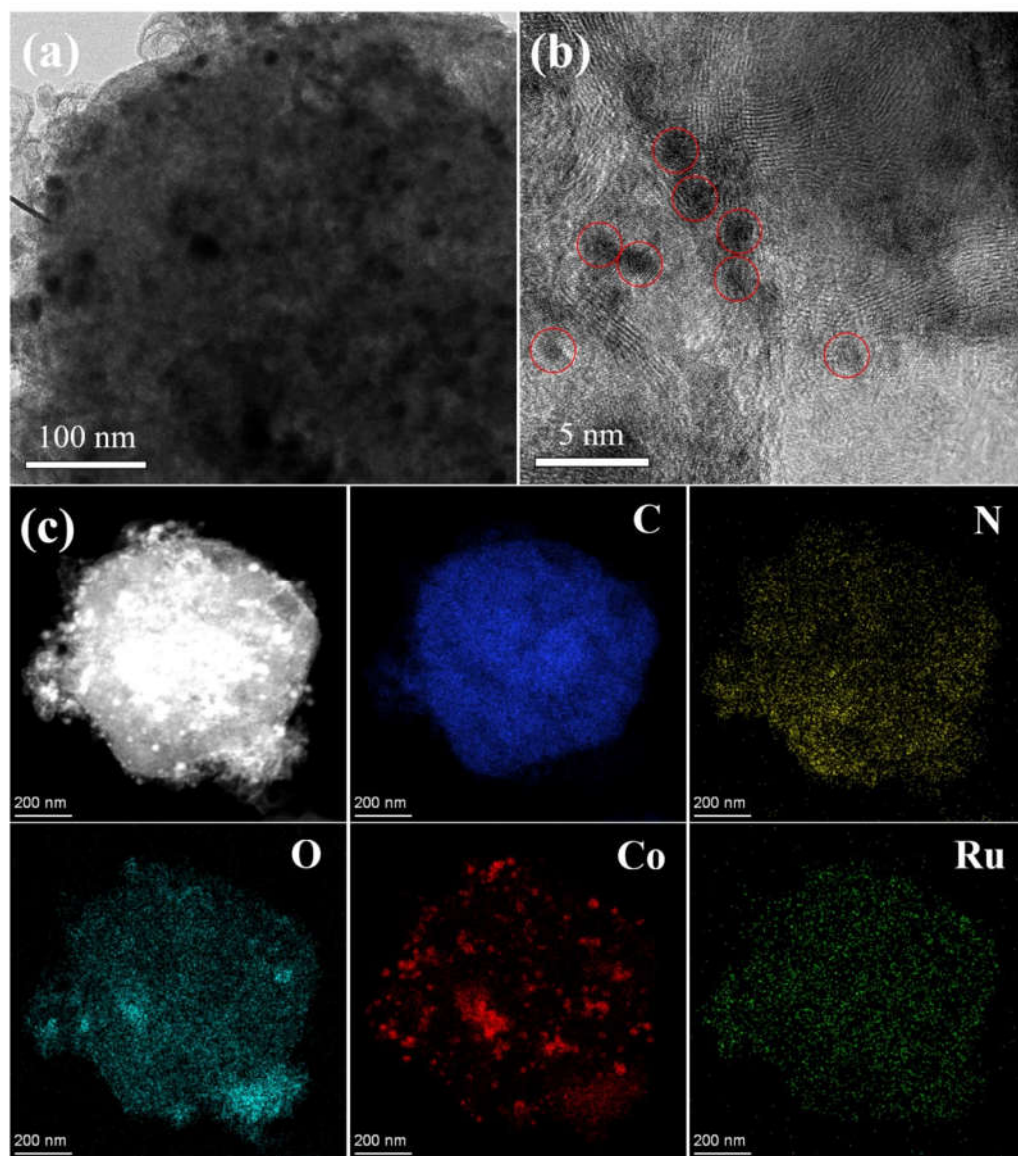

**Figure S8.** (a) TEM image, (b) HRTEM image, and (c) HAADF-STEM and corresponding EDX elemental mapping images of Ru-pCo@NC used after chronoamperometric measurements.

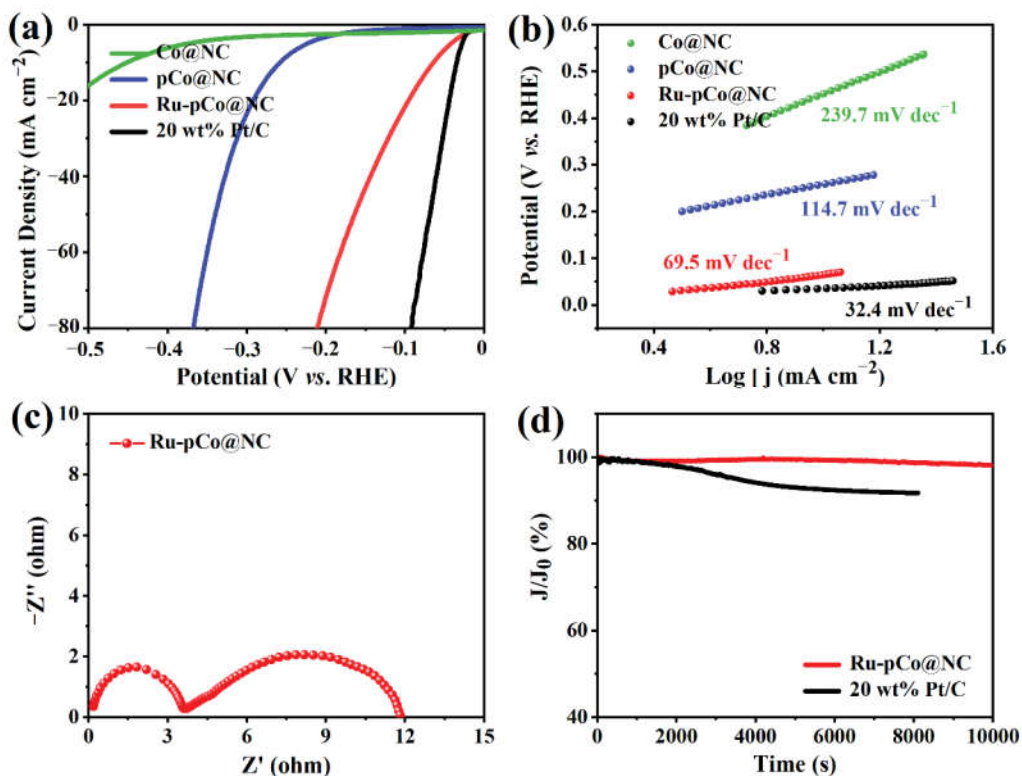

**Figure S9.** The electrochemical performance of the as-prepared catalysts in 0.5 M H<sub>2</sub>SO<sub>4</sub>. (a) *iR*-corrected LSV curves and (b) corresponding Tafel plots of Co@NC, pCo@NC, Ru-pCo@NC and 20 wt % Pt/C; (c) Nyquist plot of Ru-pCo@NC with the frequency range of 0.01 Hz to 10<sup>6</sup> Hz at an amplitude of 5 mV; (d) Comparison of long-term durability for Ru-pCo@NC and 20 wt% Pt/C by chronoamperometry test.

**Table S1.** Comparison of Ru-based electrocatalysts towards HER in alkaline electrolyte.

| Catalysts                             | Electrolyte | Overpotential                    | Tafel slope             | Reference |
|---------------------------------------|-------------|----------------------------------|-------------------------|-----------|
|                                       |             | @ 10 mA cm <sup>-2</sup><br>(mV) | (mV dec <sup>-1</sup> ) |           |
| Ru-pCo@NC                             | 1 M KOH     | 30                               | 32.1                    | This work |
| RuO <sub>2</sub> /F-grephene          | 1 M KOH     | 49                               | 31                      | [1]       |
| RuO <sub>2</sub> @C                   | 1 M KOH     | 35                               | 46                      | [2]       |
| Ru/C <sub>3</sub> N <sub>4</sub> /C   | 0.1 M KOH   | 79                               | ~71                     | [3]       |
| Ru NP/C                               | 1 M KOH     | 52                               | 33                      | [4]       |
| RuP <sub>2</sub> @NPC                 | 1 M KOH     | 52                               | 69                      | [5]       |
| Ru <sub>2</sub> Ni <sub>2</sub> SNs/C | 1 M KOH     | 40                               | 23.7                    | [6]       |
| Ru@Co-NC                              | 1 M KOH     | 23                               | 58.1                    | [7]       |
| Ru/Cu-doped<br>RuO <sub>2</sub> )     | 1 M KOH     | 41                               | 51                      | [8]       |
| 1D-RuO <sub>2</sub> -CN <sub>x</sub>  | 0.5 M KOH   | 95                               | 70                      | [9]       |
| Ni@Ni <sub>2</sub> P-Ru               | 1 M KOH     | 31                               | 41                      | [10]      |

**Table S2.** Comparison of structure features for Co@NC and pCo@NC.

| Samples   | BET Surface              | Total Pore Volume    | Average Pore Size |
|-----------|--------------------------|----------------------|-------------------|
|           | Area (m <sup>2</sup> /g) | (cm <sup>3</sup> /g) | (nm)              |
| Co@NC     | 132.5                    | 0.259                | 3.91              |
| pCo@NC    | 428.2                    | 0.517                | 2.41              |
| Ru-pCo@NC | 411.3                    | 0.459                | 2.23              |

**Table S3.** Comparison of the HER performance of Ru-pCo@NC with reported electrocatalysts in acidic electrolyte.

| Catalysts                                           | Electrolyte                          | Overpotential                    | Tafel slope             | Reference |
|-----------------------------------------------------|--------------------------------------|----------------------------------|-------------------------|-----------|
|                                                     |                                      | @ 10 mA cm <sup>-2</sup><br>(mV) | (mV dec <sup>-1</sup> ) |           |
| Ru-pCo@NC                                           | 0.5 M H <sub>2</sub> SO <sub>4</sub> | 64                               | 69.5                    | This work |
| Ru@Co-NC                                            | 0.5 M H <sub>2</sub> SO <sub>4</sub> | 110                              | 102.5                   | [7]       |
| 1D-RuO <sub>2</sub> -CN <sub>x</sub>                | 0.5 M H <sub>2</sub> SO <sub>4</sub> | 93                               | 40                      | [9]       |
| Ru/C <sub>3</sub> N <sub>4</sub> /C                 | 0.5 M H <sub>2</sub> SO <sub>4</sub> | ~75                              | ~50                     | [3]       |
| Ru-SA/Ti <sub>3</sub> C <sub>2</sub> T <sub>x</sub> | 0.1 M HClO <sub>4</sub>              | 70                               | 27.7                    | [11]      |
| Mo <sub>x</sub> C-IOL                               | 0.5 M H <sub>2</sub> SO <sub>4</sub> | 117                              | 60                      | [12]      |
| CoP/CC                                              | 0.5 M H <sub>2</sub> SO <sub>4</sub> | 67                               | 51                      | [13]      |
| NiCo <sub>2</sub> P <sub>x</sub> /CF                | 0.5 M H <sub>2</sub> SO <sub>4</sub> | 104                              | 59.6                    | [14]      |
| Fe-doped CoP/Ti                                     | 0.5 M H <sub>2</sub> SO <sub>4</sub> | 78                               | 75                      | [15]      |

## Supplymental Reference

1. Fan, Z., Liao, F., Shi, H., Liu, Y., Shao, M., Kang, Z., Highly efficient water splitting over a RuO<sub>2</sub>/F-doped graphene electrocatalyst with ultra-low ruthenium content, *Inorg. Chem. Front.* 2020, 7, 2188-2194.
2. Park, H.-S., Yang, J., Cho, M.K., Lee, Y., Cho, S., Yim, S.-D., Kim, B.-S., Jang, J.H., Song, H.-K., RuO<sub>2</sub> nanocluster as a 4-in-1 electrocatalyst for hydrogen and oxygen electrochemistry, *Nano Energy* 2019, 55, 49-58.
3. Zheng, Y., Jiao, Y., Zhu, Y., Li, L.H., Han, Y., Chen, Y., Jaroniec, M., Qiao, S.-Z., High Electrocatalytic Hydrogen Evolution Activity of an Anomalous Ruthenium Catalyst, *J. Am. Chem. Soc.* 2016, 138, 16174-16181.
4. Wang, Q., Ming, M., Niu, S., Zhang, Y., Fan, G., Hu, J.-S., Scalable Solid-State Synthesis of Highly Dispersed Uncapped Metal (Rh, Ru, Ir) Nanoparticles for Efficient Hydrogen Evolution, *Adv. Energy Mater.* 2018, 8.
5. Pu, Z., Amiin, I.S., Kou, Z., Li, W., Mu, S., RuP<sub>2</sub>-Based Catalysts with Platinum-like Activity and Higher Durability for the Hydrogen Evolution Reaction at All pH Values, *Angew. Chemie Int. Ed.* 2017, 56, 11559-11564.
6. Ding, J., Shao, Q., Feng, Y., Huang, X., Ruthenium-nickel sandwiched nanoplates for efficient water splitting electrocatalysis, *Nano Energy* 2018, 47, 1-7.
7. Gao, H.W., Zang, J.B., Liu, X.X., Wang, Y.H., Tian, P.F., Zhou, S.Y., Song, S.W., Chen, P.P., Li, W., Ruthenium and cobalt bimetal encapsulated in nitrogen-doped carbon material derived of ZIF-67 as enhanced hydrogen evolution electrocatalyst, *Appl. Surf. Sci.* 2019, 494, 101-110.
8. Yang, K., Xu, P., Lin, Z., Yang, Y., Jiang, P., Wang, C., Liu, S., Gong, S., Hu, L., Chen, Q., Ultrasmall Ru/Cu-doped RuO<sub>2</sub> Complex Embedded in Amorphous Carbon Skeleton as Highly Active Bifunctional Electrocatalysts for Overall Water Splitting, *Small* 2018, 14.
9. Bhowmik, T., Kundu, M.K., Barman, S., Growth of One-Dimensional RuO<sub>2</sub> Nanowires on g-Carbon Nitride: An Active and Stable Bifunctional Electrocatalyst for Hydrogen and Oxygen Evolution Reactions at All pH Values, *ACS Appl. Mater. Interfaces* 2016, 8, 28678-28688.
10. Liu, Y., Liu, S., Wang, Y., Zhang, Q., Gu, L., Zhao, S., Xu, D., Li, Y., Bao, J., Dai, Z., Ru Modulation Effects in the Synthesis of Unique Rod-like Ni@Ni<sub>2</sub>P-Ru Heterostructures and Their Remarkable Electrocatalytic Hydrogen Evolution Performance, *J. Am. Chem. Soc.* 2018, 140, 2731-2734.
11. Peng, X., Zhao, S., Mi, Y., Han, L., Liu, X., Qi, D., Sun, J., Liu, Y., Bao, H., Zhuo, L., Xin, H.L., Luo, J., Sun, X., Trifunctional Single-Atomic Ru Sites Enable Efficient Overall Water Splitting and Oxygen Reduction in Acidic Media, *Small* 2020, 16.
12. Li, F., Zhao, X., Mahmood, J., Okyay, M.S., Jung, S.-M., Ahmad, I., Kim, S.-J., Han, G.-F., Park, N., Baek, J.-B., Macroporous Inverse Opal-like MoXC with Incorporated Mo Vacancies for Significantly Enhanced Hydrogen Evolution, *Acs Nano* 2017, 11, 7527-7533.
13. Tian, J., Liu, Q., Asiri, A.M., Sun, X., Self-Supported Nanoporous Cobalt Phosphide Nanowire Arrays: An Efficient 3D Hydrogen-Evolving Cathode over the Wide Range of pH 0-14, *J. Am. Chem. Soc.* 2014, 136, 7587-7590.
14. Zhang, R., Wang, X., Yu, S., Wen, T., Zhu, X., Yang, F., Sun, X., Wang, X., Hu, W., Ternary

- 
- NiCo<sub>2</sub>Px Nanowires as pH-Universal Electrocatalysts for Highly Efficient Hydrogen Evolution Reaction, *Adv. Mater.* 2017, 29.
15. Tang, C., Zhang, R., Lu, W., He, L., Jiang, X., Asiri, A.M., Sun, X., Fe-Doped CoP Nanoarray: A Monolithic Multifunctional Catalyst for Highly Efficient Hydrogen Generation, *Adv. Mater.* 2017, 29.
